# Supplementary material for: Landscape of brain myeloid cell transcriptome along the spatiotemporal progression of Alzheimer’s disease reveals distinct sequential responses to Aβ and tau
Source: PubMed Central journal article supplement (PMC10984903; doi:10.1007/s00401-024-02704-2), 2024-04-01

Figure S1

a

|                                     | Pathology Group 1    | Pathology Group 2        | Pathology Group 3   | Pathology Group 4    |
|-------------------------------------|----------------------|--------------------------|---------------------|----------------------|
| <i>Definition</i>                   | Braak 0-II<br>Thal 0 | Braak II-III<br>Thal 1-4 | Braak V<br>Thal 3-5 | Braak VI<br>Thal 3-5 |
| <i>Variable</i>                     |                      |                          |                     |                      |
| <b>Sex: n (%)</b>                   |                      |                          |                     |                      |
| <b>Female</b>                       | 4 (50)               | 5 (62.5)                 | 6 (75)              | 4 (50)               |
| <b>Male</b>                         | 4 (50)               | 3 (37.4)                 | 2 (25)              | 4 (50)               |
| <b>Age (yrs)*:<br/>mean (SD)</b>    | 79.5 (12.3)          | 86.0 (6.6)               | 82.9 (7.9)          | 79.5 (10.4)          |
| <b>PMI (hrs):<br/>mean (SD)</b>     | 18.4 (6.8)           | 22.1 (11.3)              | 18.3 (11.5)         | 15.6 (7.1)           |
| <b>APOE<br/>status: n (%)</b>       |                      |                          |                     |                      |
| <b>2/2</b>                          | 0 (0)                | 1 (12.5)                 | 0 (0)               | 0 (0)                |
| <b>2/3</b>                          | 0 (0)                | 1 (12.5)                 | 1 (12.5)            | 0 (0)                |
| <b>3/3</b>                          | 8 (100)              | 6 (75)                   | 4 (50)              | 4 (50)               |
| <b>3/4</b>                          | 0 (0)                | 0 (0)                    | 2 (25)              | 4 (50)               |
| <b>4/4</b>                          | 0 (0)                | 0 (0)                    | 1 (12.5)            | 0 (0)                |
| <b>Brain<br/>regions:<br/>n (%)</b> |                      |                          |                     |                      |
| <b>EC</b>                           | 3 (37.5)             | 7 (87.5)                 | 6 (75)              | 7 (87.5)             |
| <b>ITG</b>                          | 7 (87.5)             | 8 (100)                  | 8 (100)             | 8 (100)              |
| <b>PFC</b>                          | 4 (50)               | 8 (100)                  | 8 (100)             | 8 (100)              |
| <b>V2</b>                           | 8 (100)              | 8 (100)                  | 8 (100)             | 8 (100)              |
| <b>V1</b>                           | 8 (100)              | 8 (100)                  | 8 (100)             | 8 (100)              |

\* Donors of age 90+ yrs were considered being of age 90 yrs for calculation of mean/SD only.

b

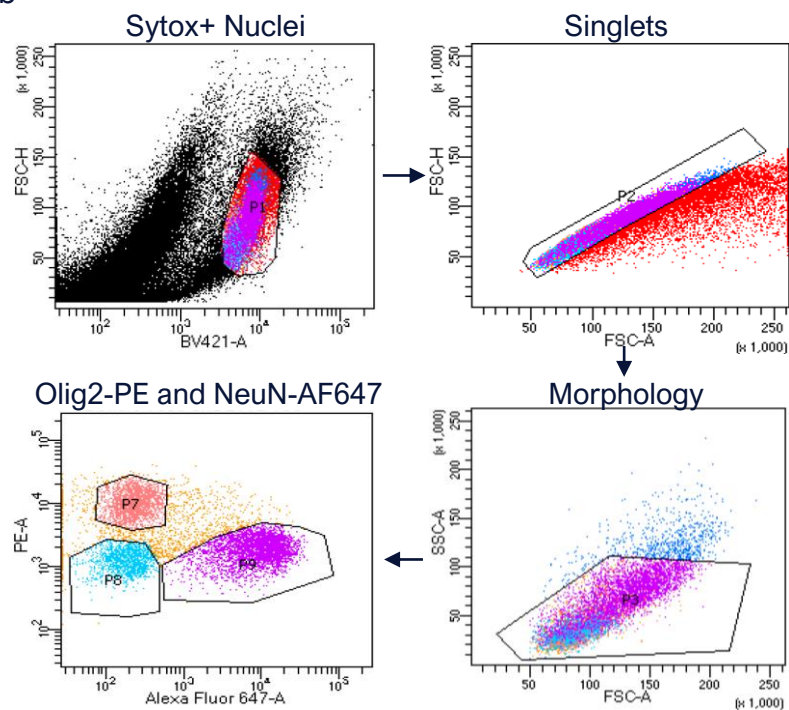

c

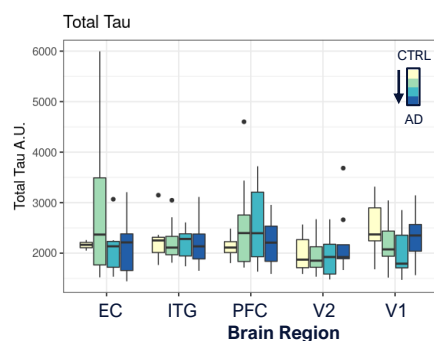

d

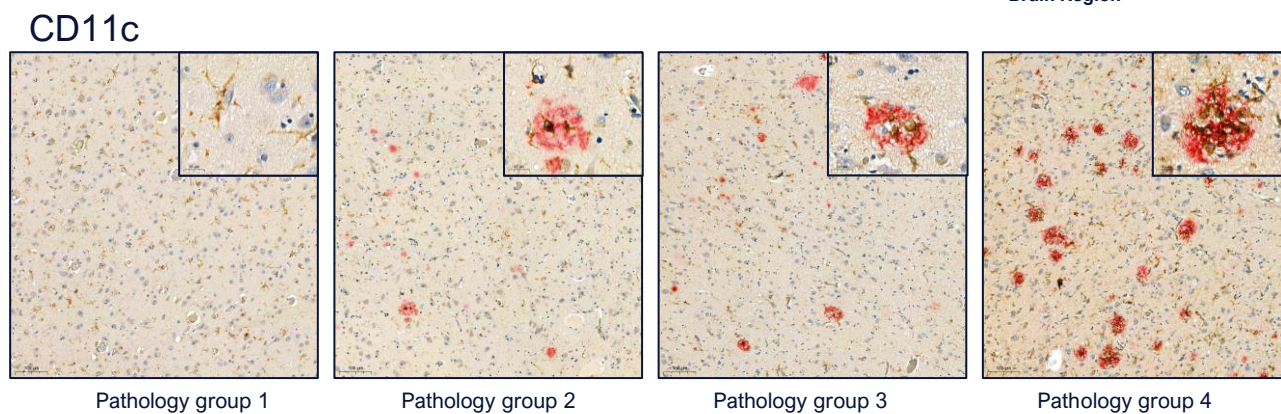

e

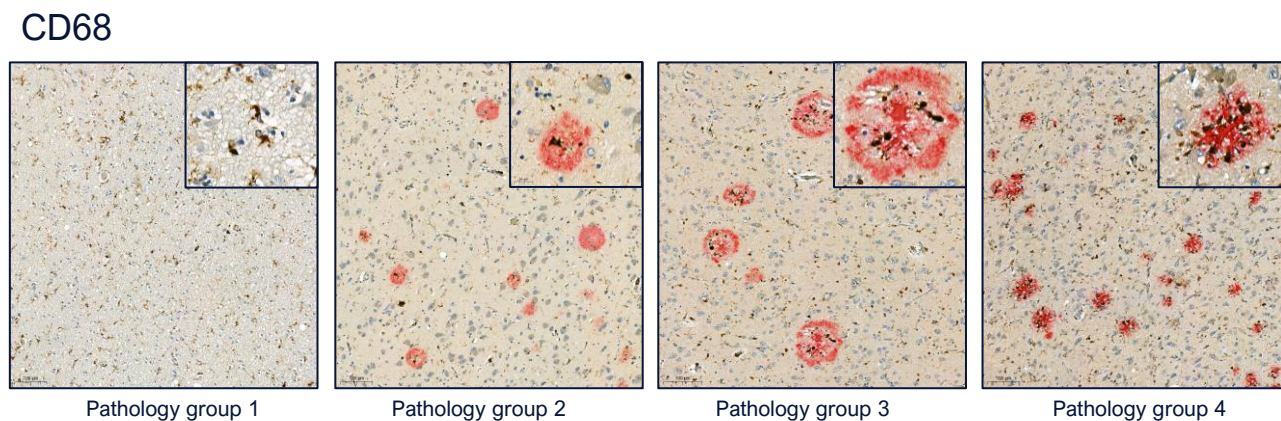

Figure S2

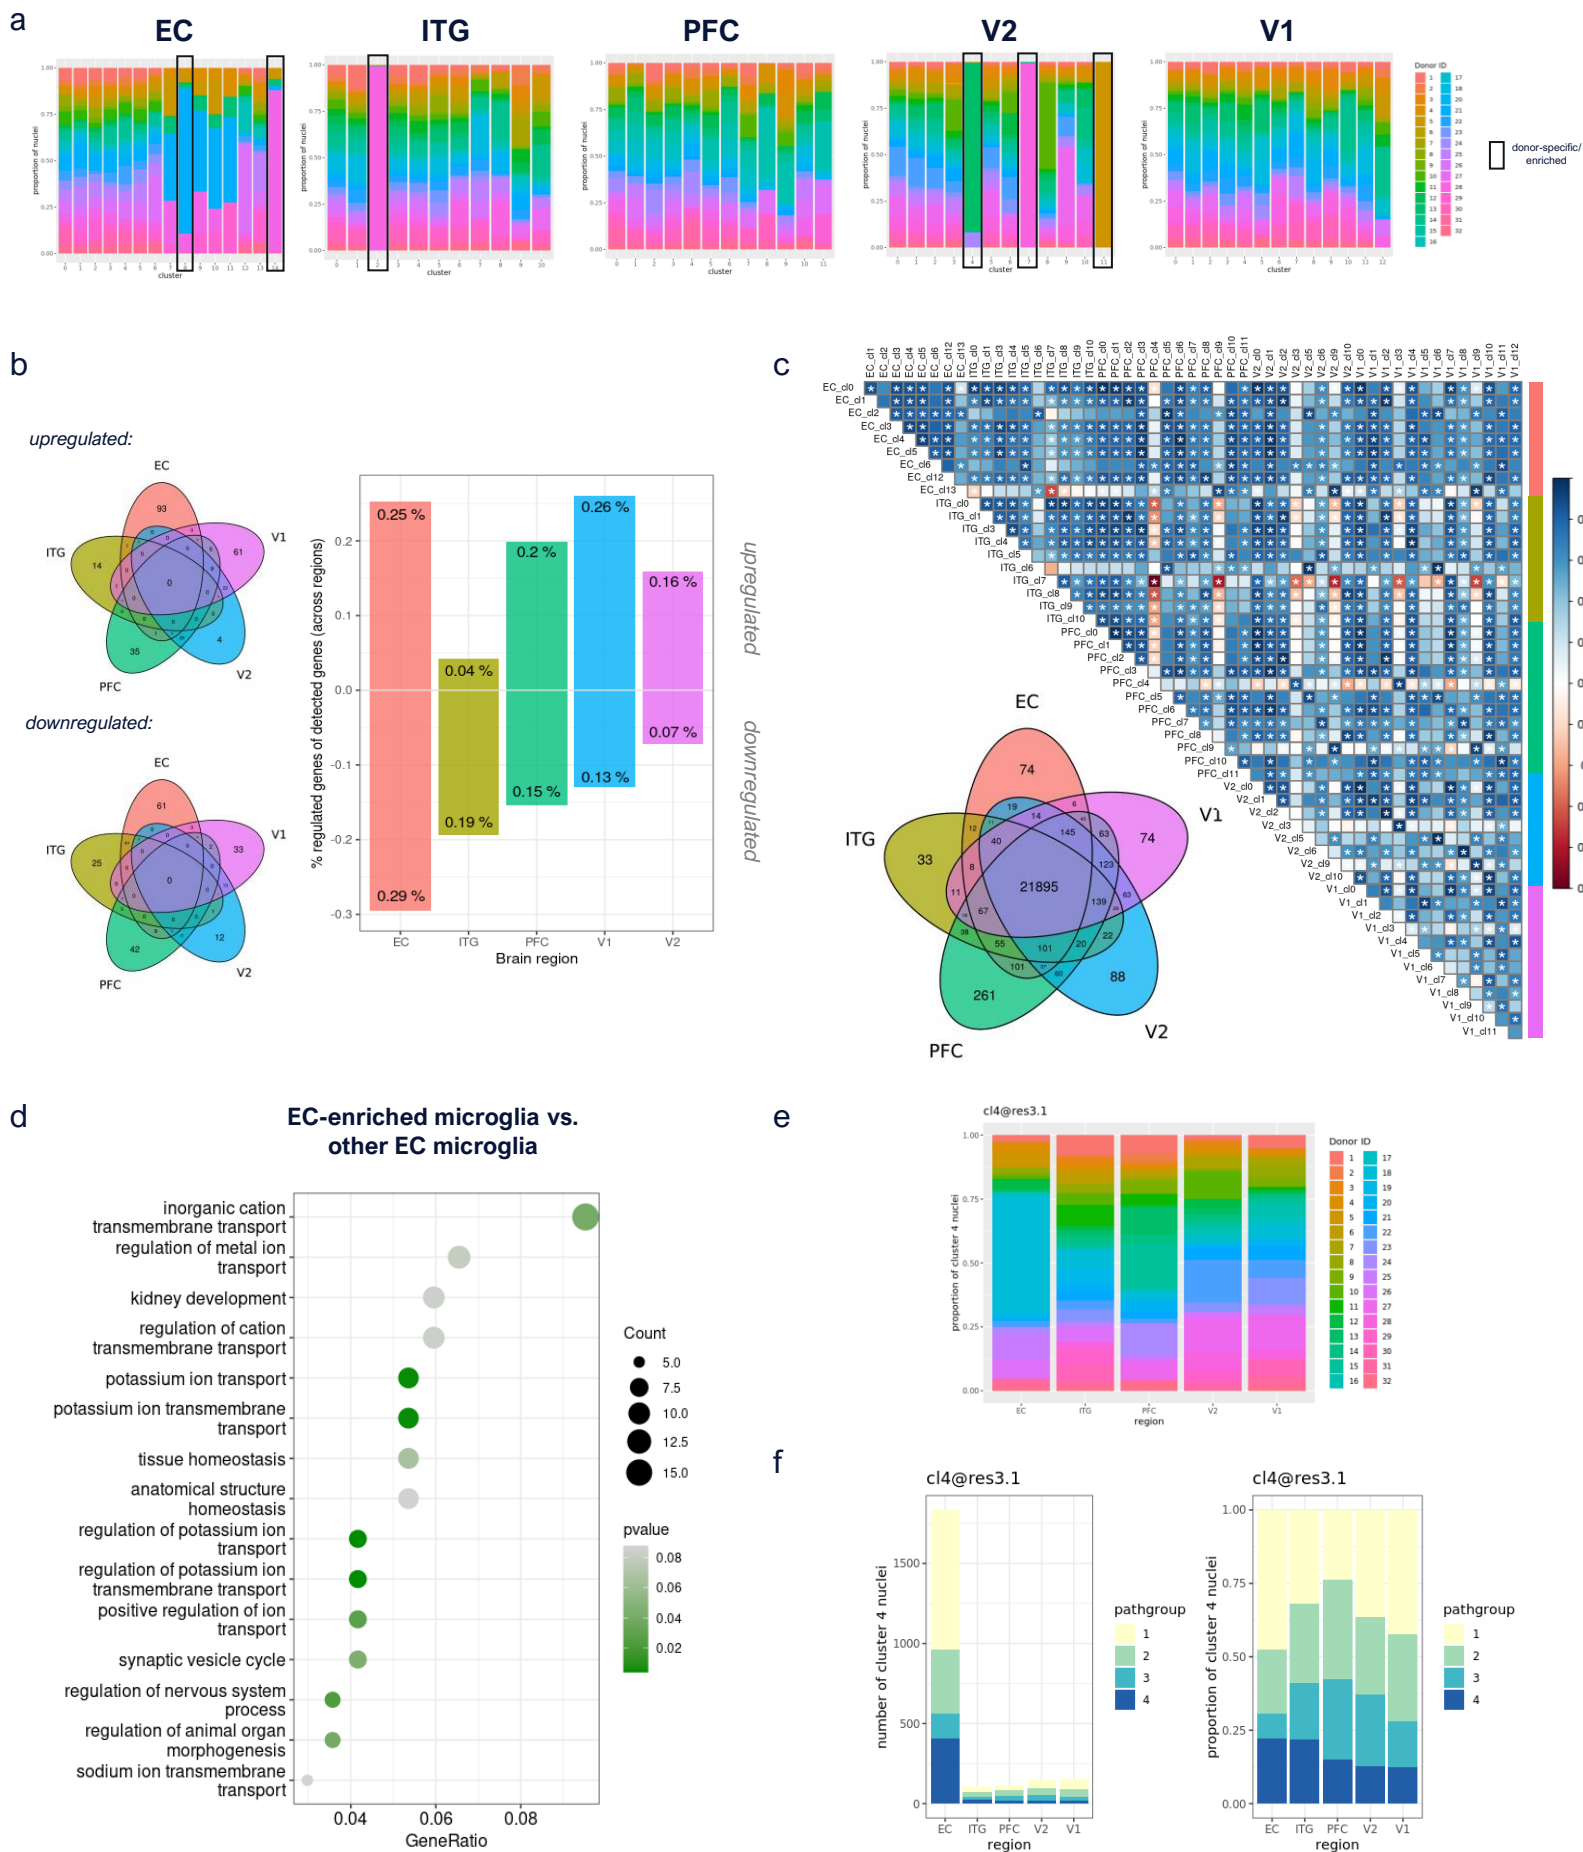



Figure S3

a

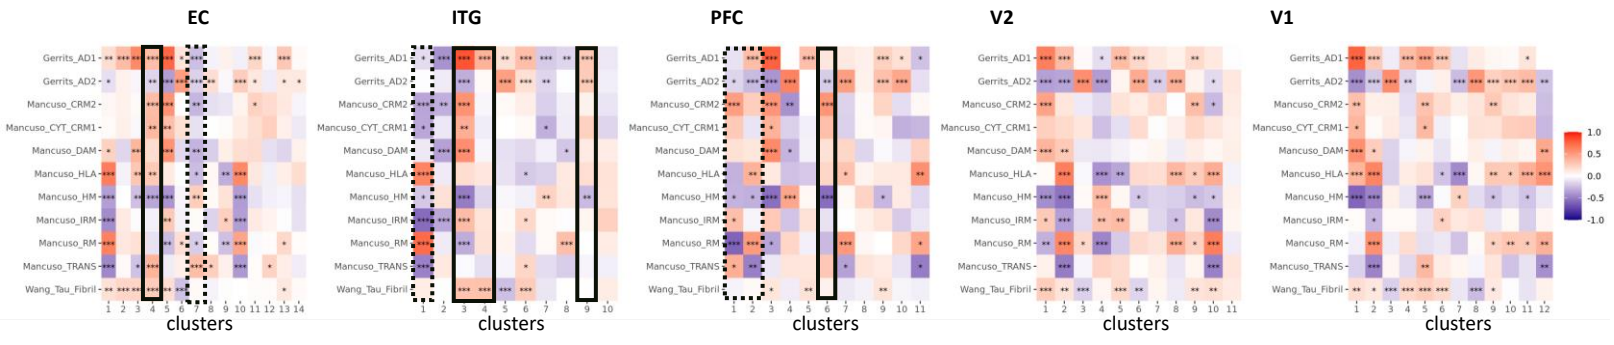

b

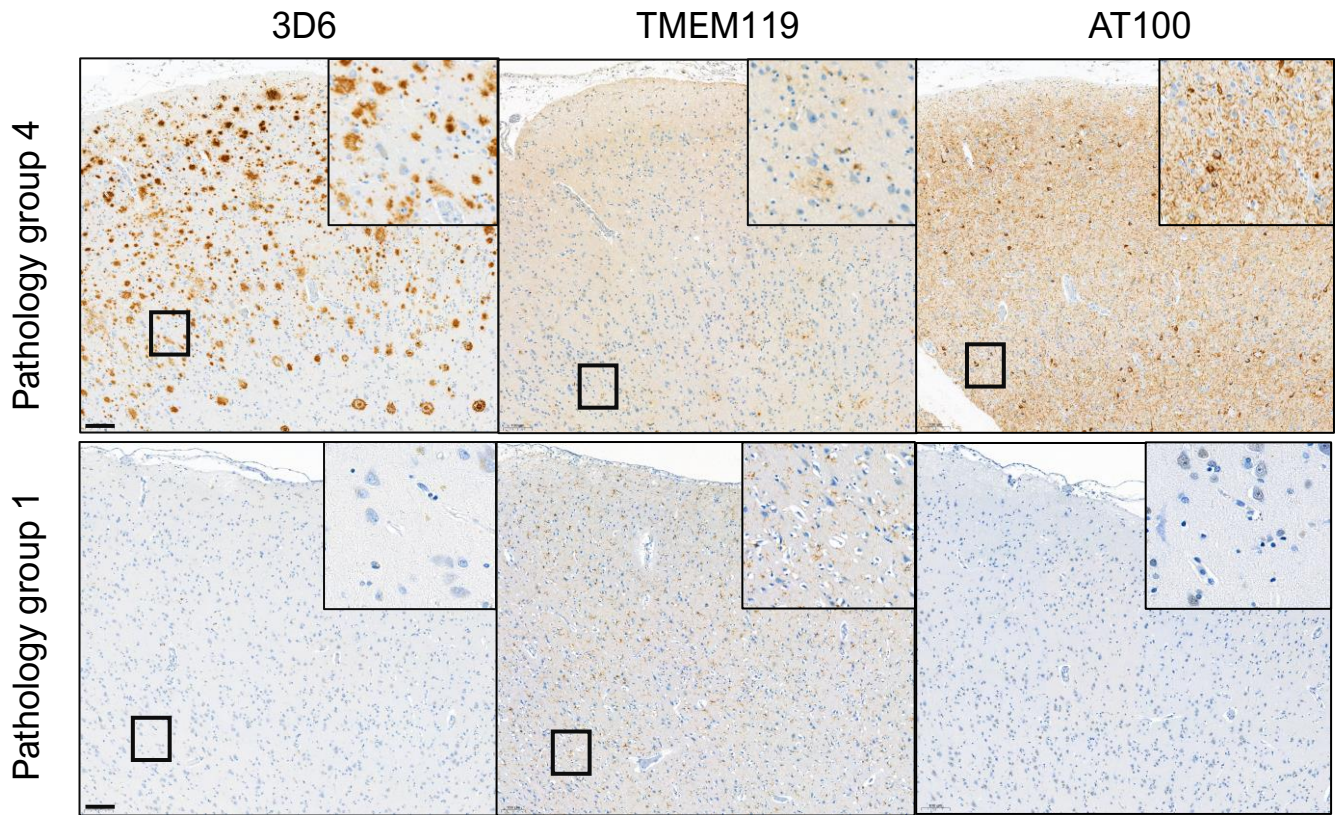



Figure S3

c

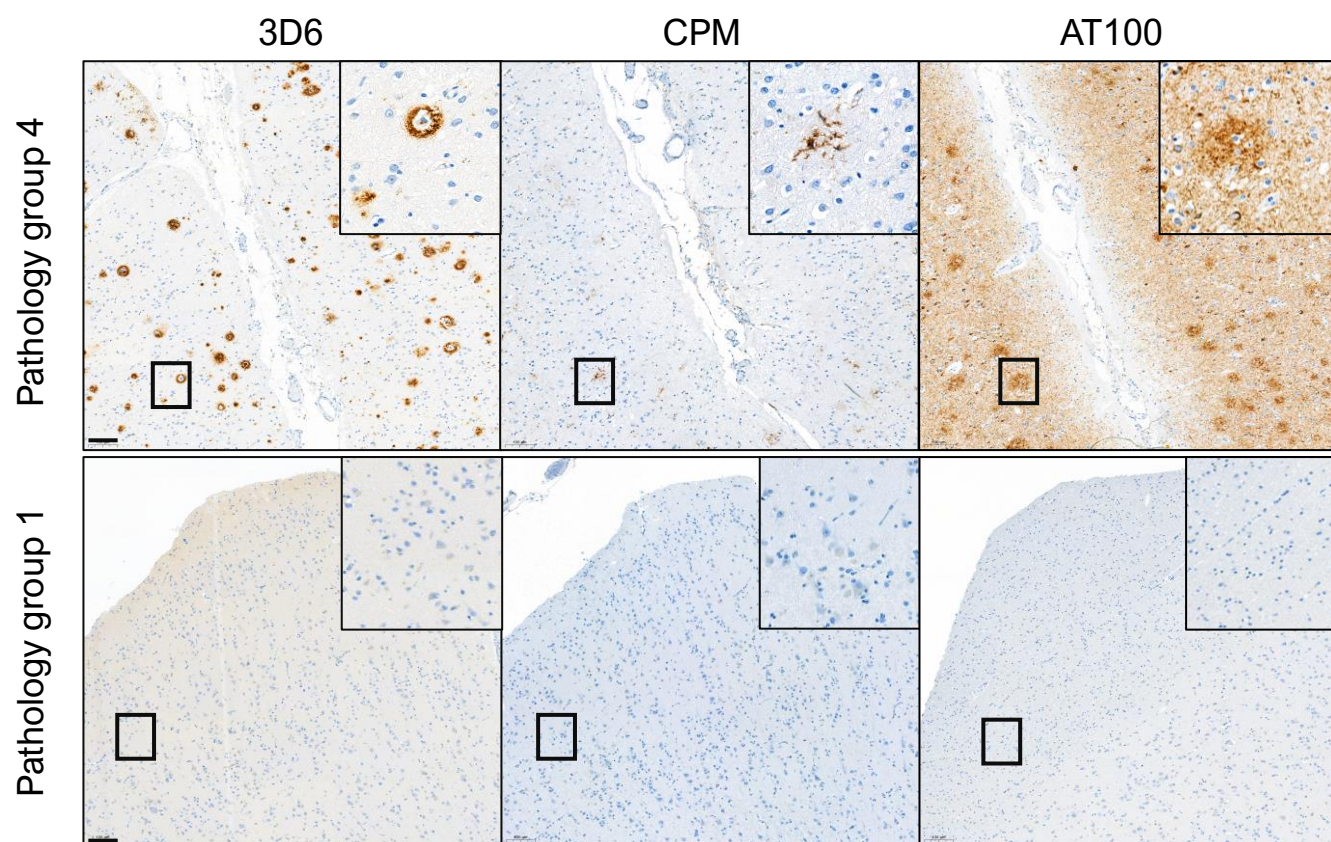

d

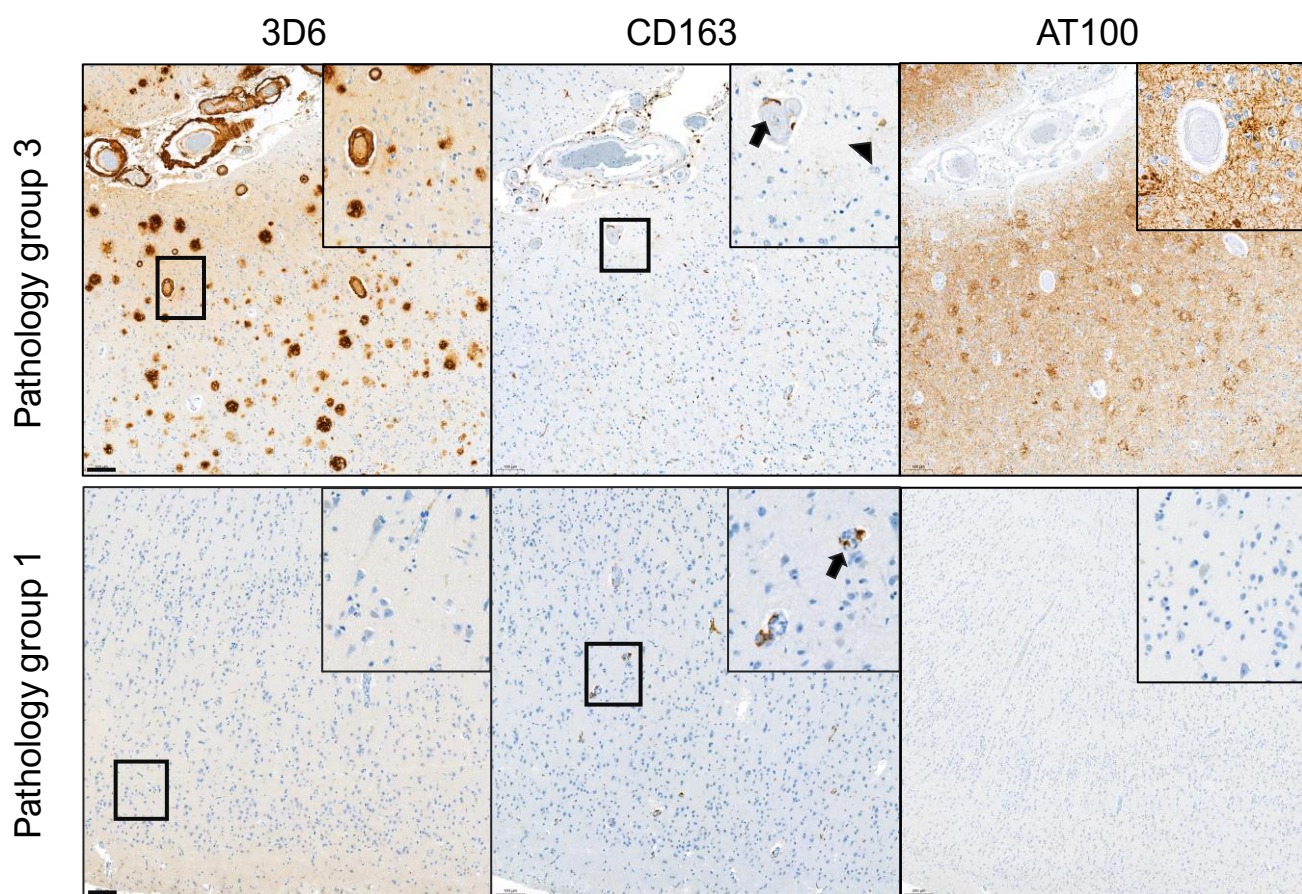



Figure S3

e

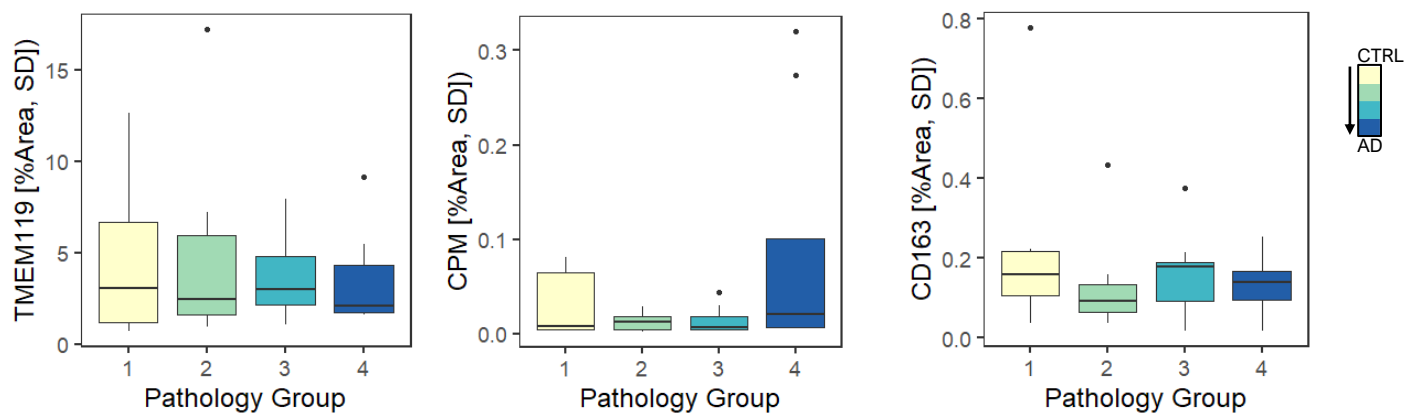

f

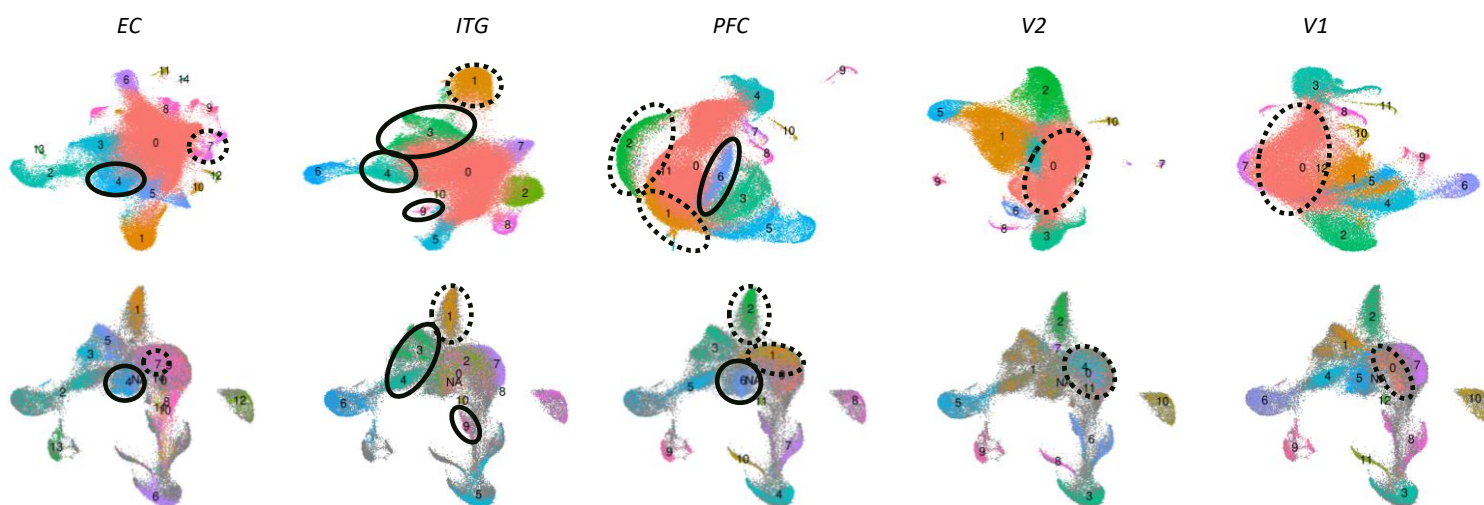

g

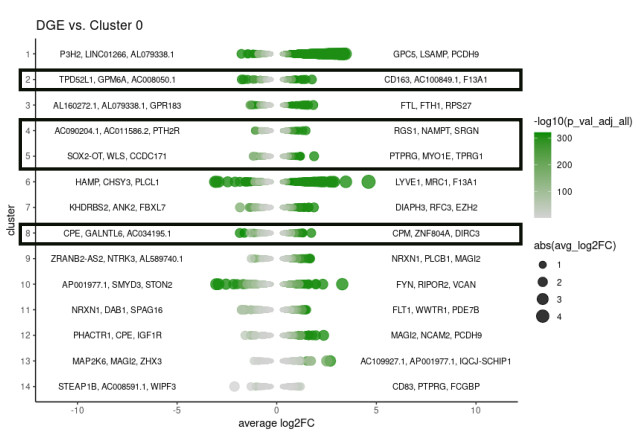

h

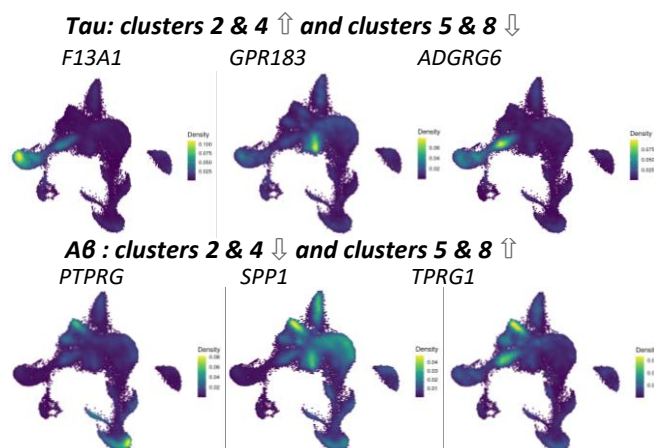

i

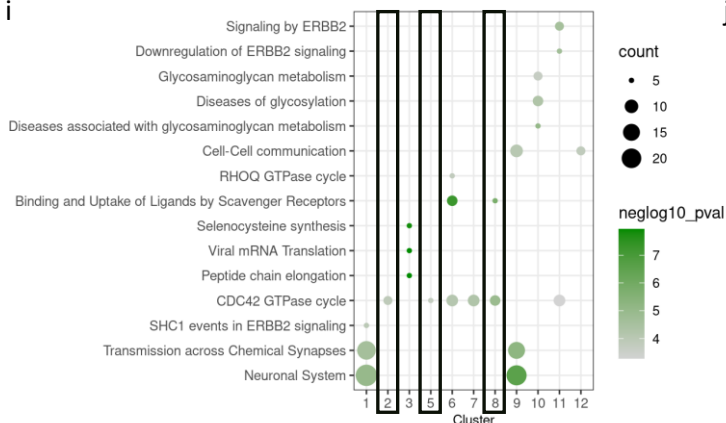

j

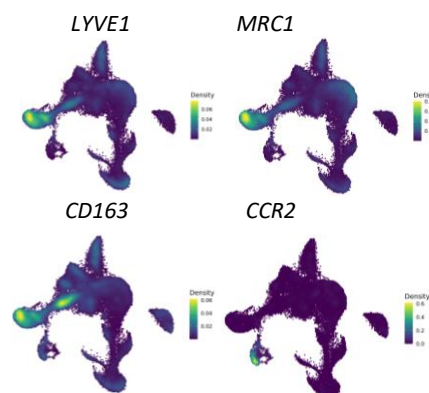

Figure S4

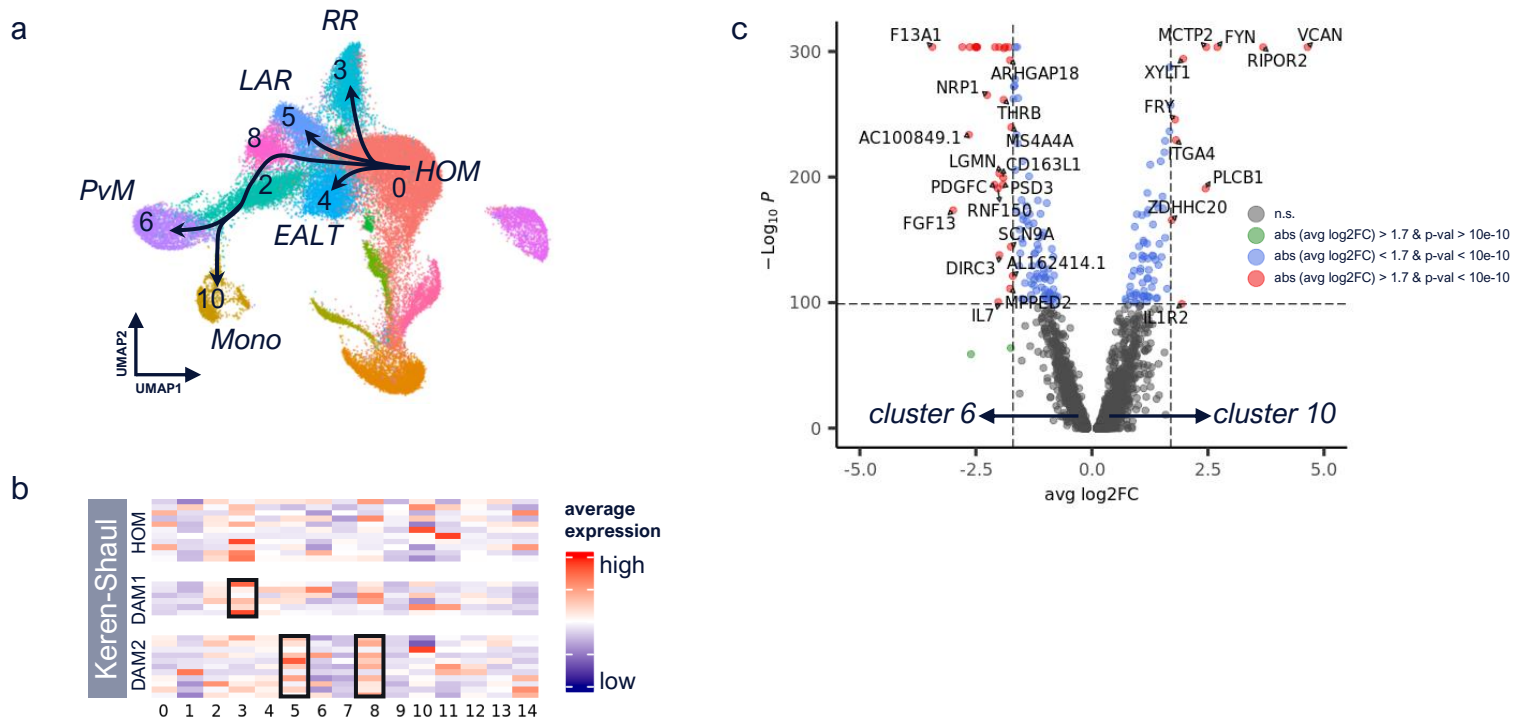

Figure S5

a

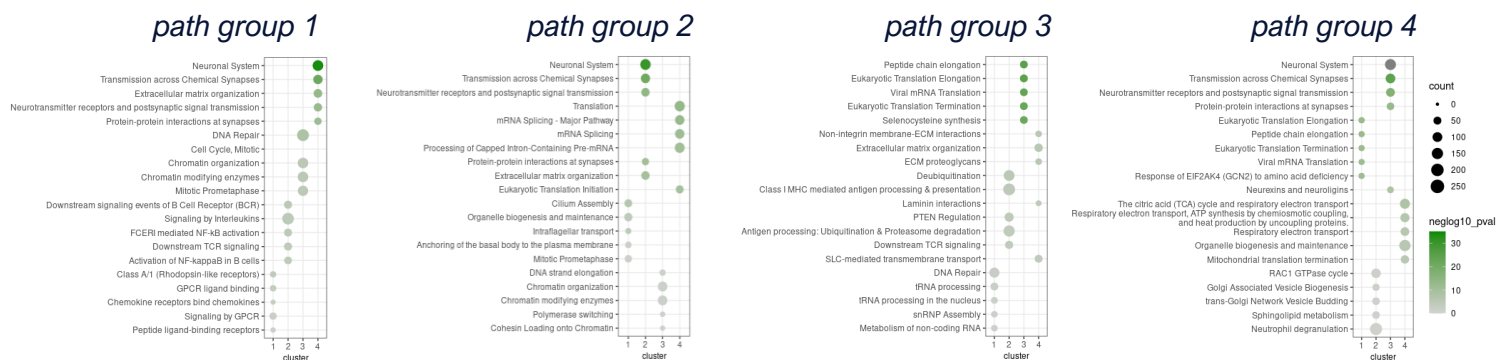

b

Gene: BACH1

Gene: PRR5

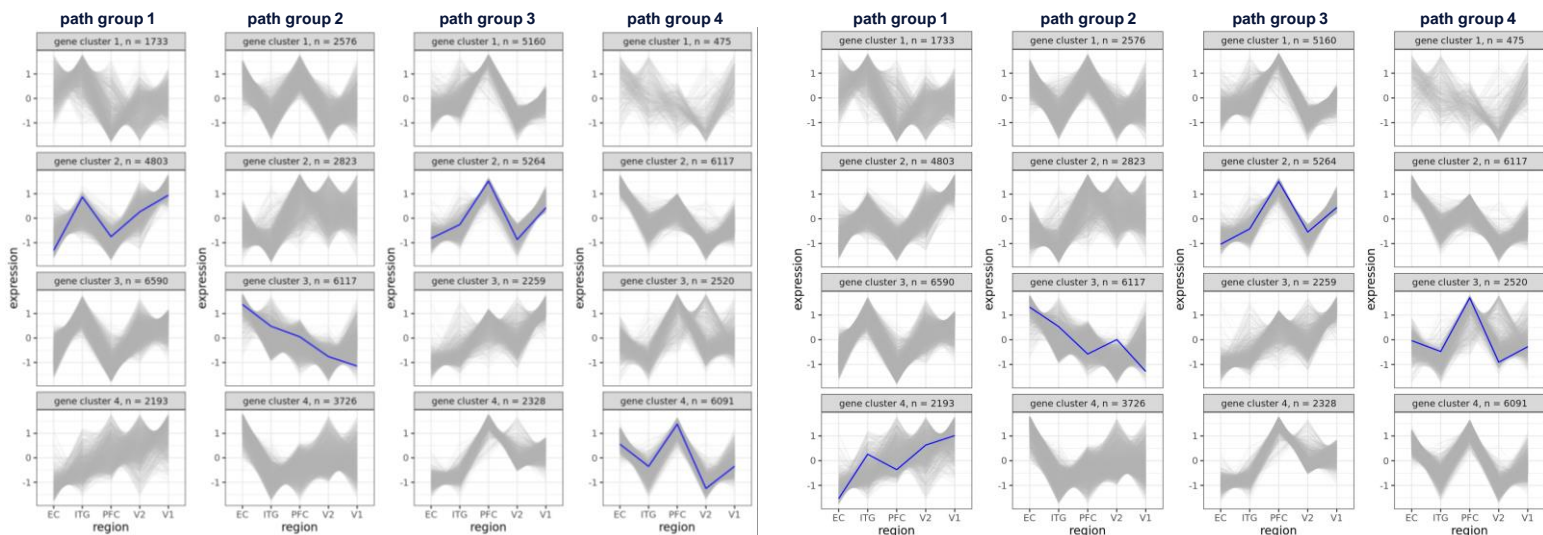

Supplement: 401_2024_2704_MOESM1_ESM.pdf [file 401_2024_2704_MOESM1_ESM.pdf]
